# Supplementary material for: Citizen science and early detection of invasive species: phenology of first occurrences of Halyomorpha halys in Southern Europe
Source: Springer Nature journal article supplement (doi:10.1007/s10530-016-1217-z), 2016-07-04
Supplement: MOESM3 [file 10530_2016_1217_MOESM3_ESM.pdf]

## ***Halyomorpha halys* identification keys – Figures**

- Supplementary material for: BIOLOGICAL INVASIONS
- Title: Citizen science and early detection of invasive species: phenology of first occurrences of *Halyomorpha halys* in Southern Europe
- Authors: Lara Maistrello, Paride Dioli, Massimo Bariselli, Gian Lorenzo Mazzoli and Isabella Giacalone-Forini
- Corresponding author: Lara Maistrello, Dipartimento di Scienze della Vita, Università di Modena e Reggio Emilia, Pad. Besta, Via G. Amendola 2, I-42122, Reggio Emilia, Reggio Emilia, Italy
- E-mail: [lara.maistrello@unimore.it](mailto:lara.maistrello@unimore.it), Phone +390522522002, Fax+390522522027

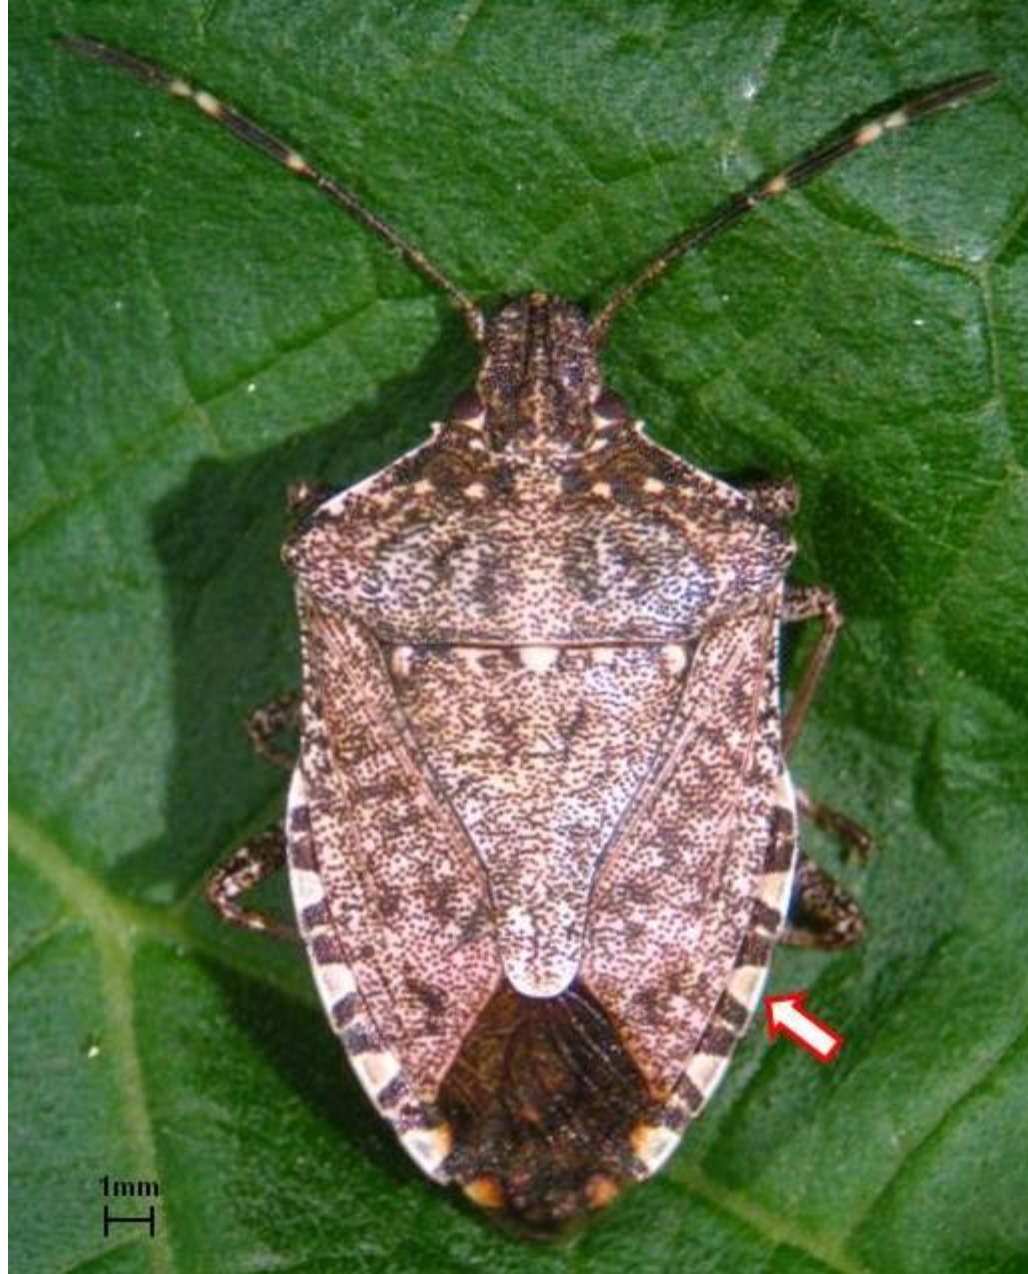

**Fig. 1** A female *Halyomorpha halys* adult, dorsal view. Arrow indicates the connexivum with typical pattern (photo: S. Bortolini).

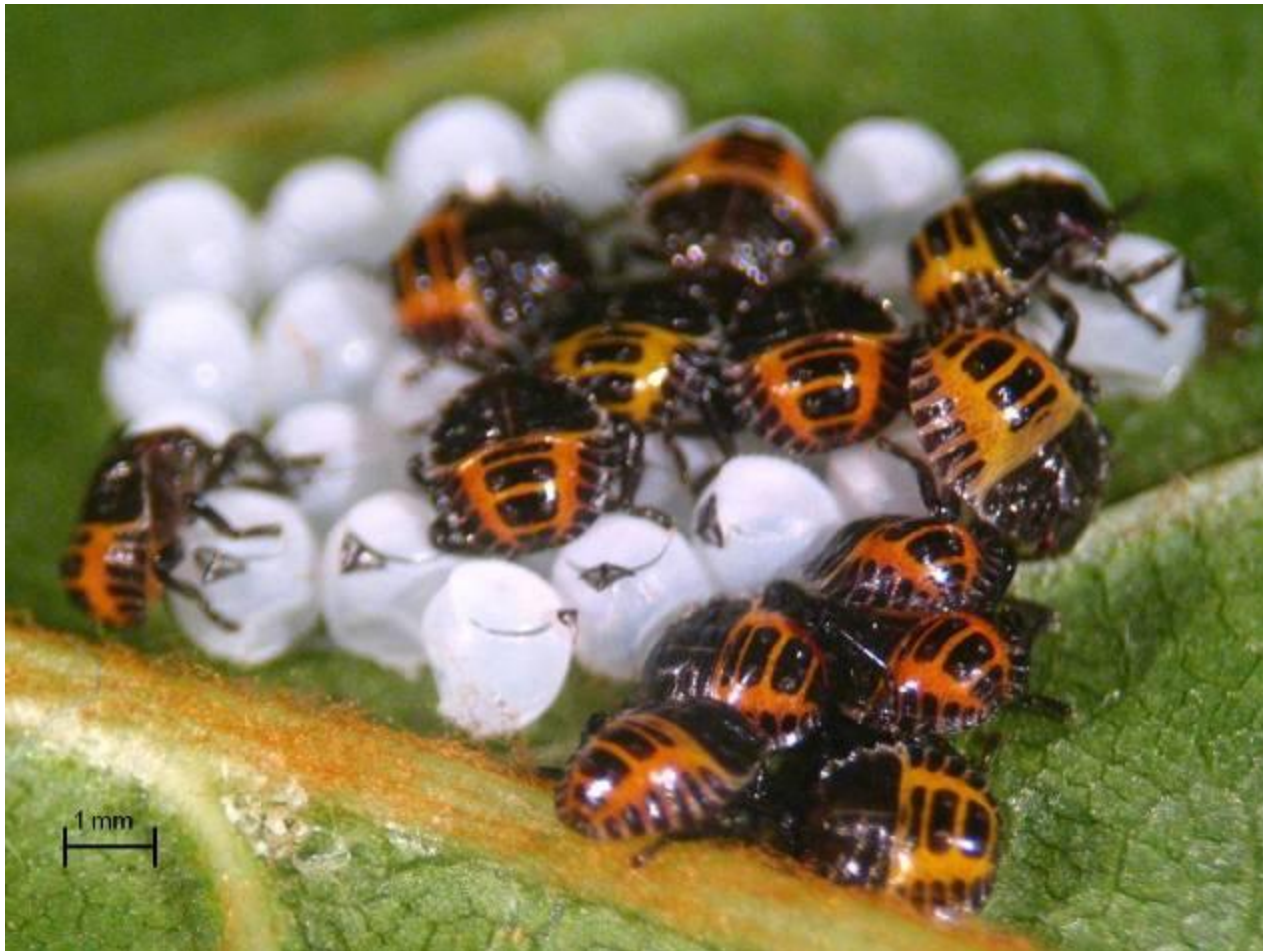

**Fig. 2** An *Halyomorpha halys* egg mass with first instar nymphs feeding on the eggs (photo: S. Bortolini).



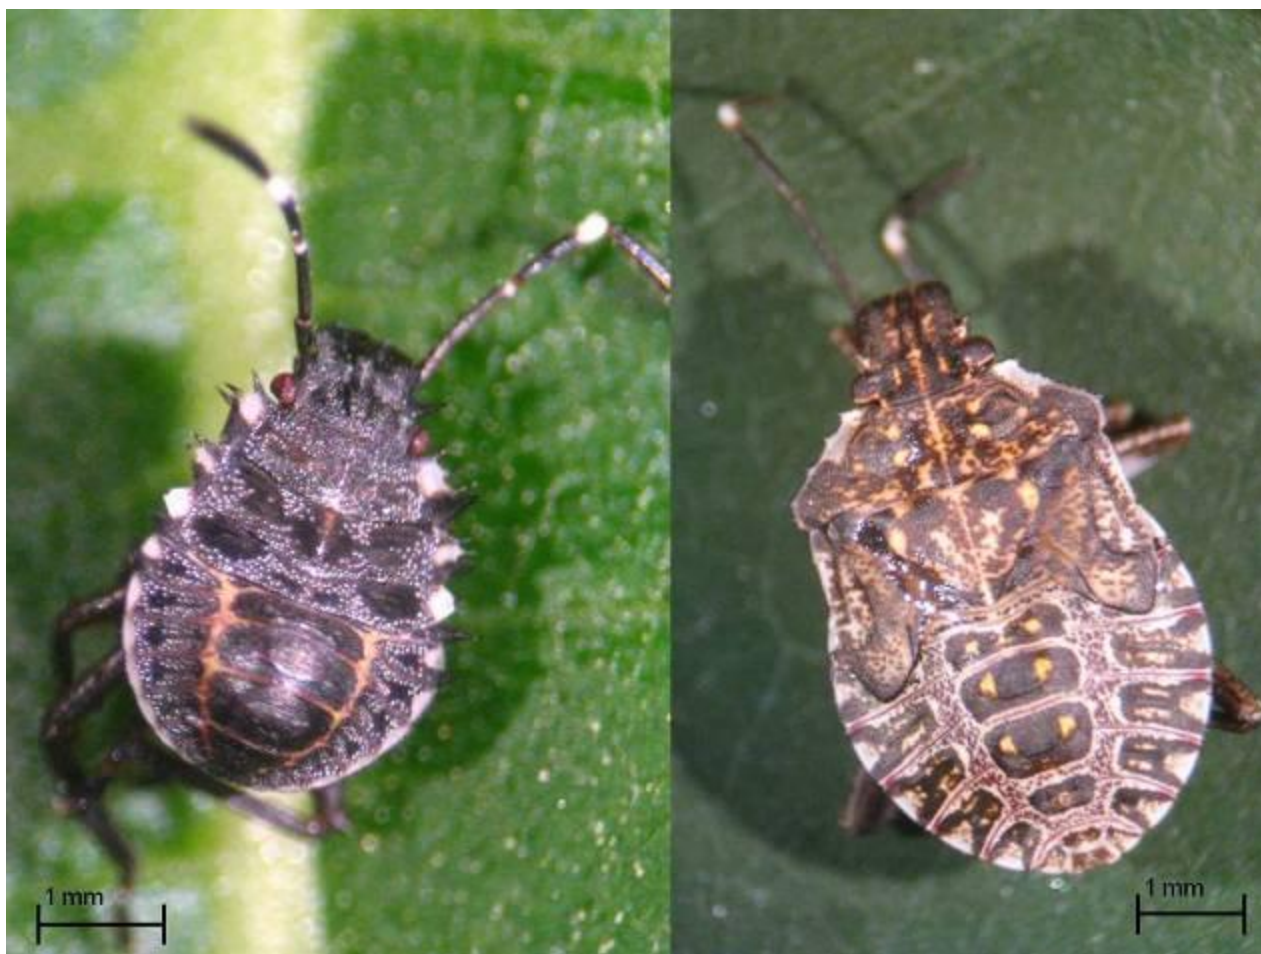

**Fig. 3** *Halyomorpha halys* second (left) and fourth (right) instar nymphs (photo: S. Bortolini).

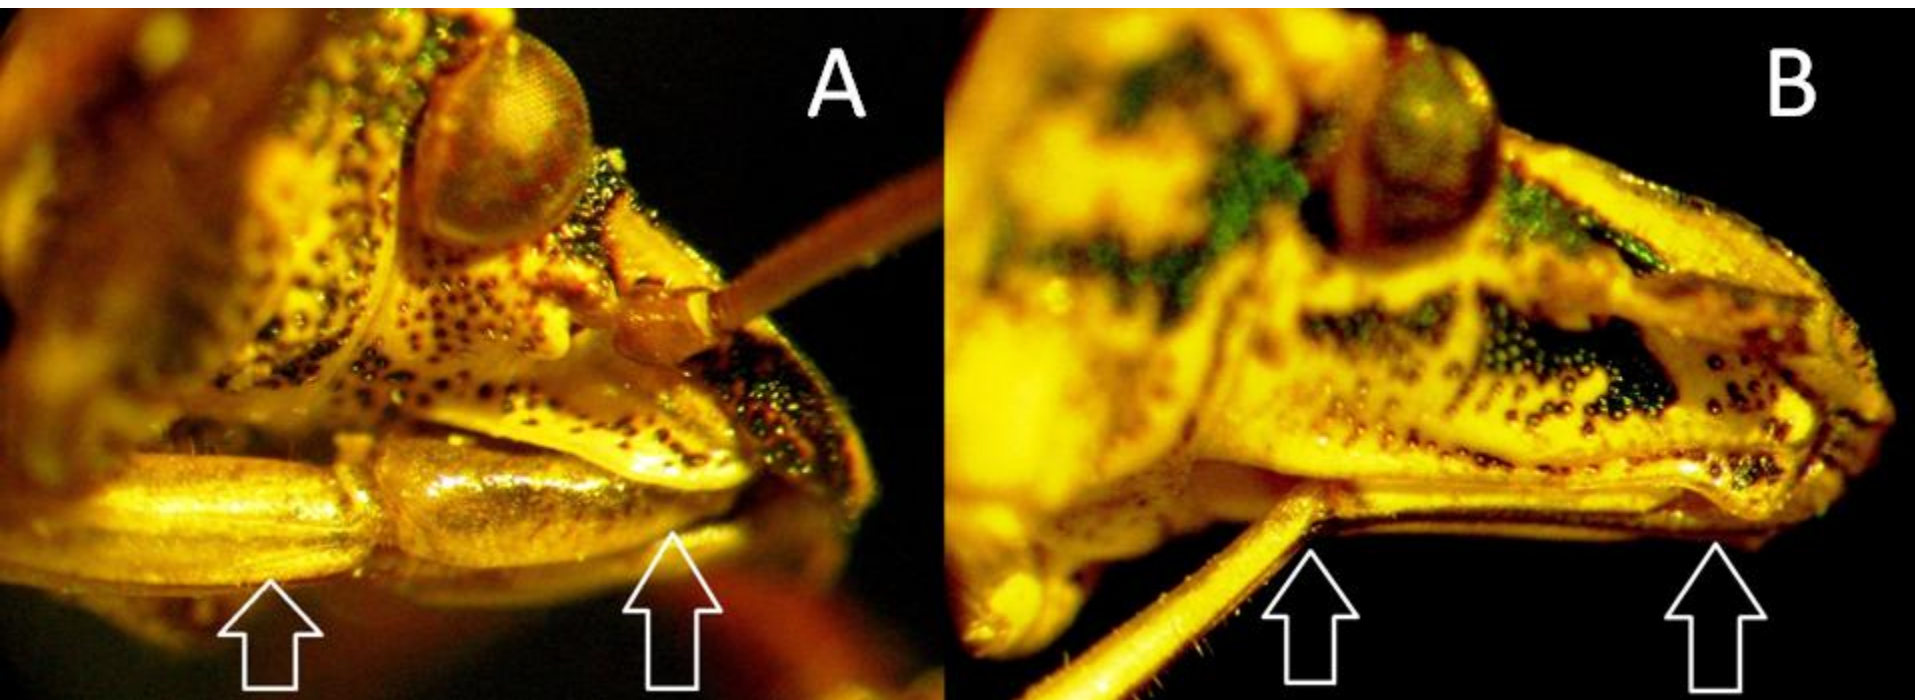

**Fig. 4** Apex of head of an Asopinae (a) and of Podopinae and Pentatominae (b). Arrows indicate different position of rostrum and labium between bucculae (photo: P.Dioli).

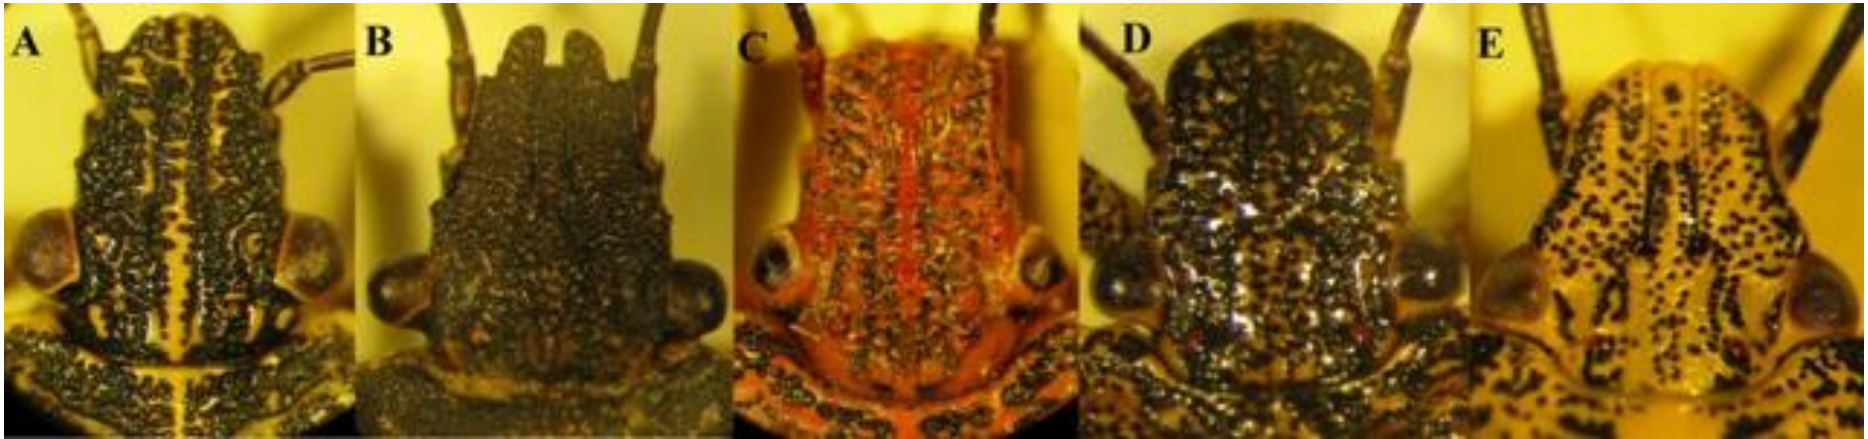

**Fig. 5** Different shapes of head in Pentatominae. Head with antenniferous tubercles visible from above, in the case of tribe Halyini, represented by *Dalpada oculata* (A), *Cahara tibetana* (B), *Apodiphus integriceps* (C), and in the case of tribe Cappaeini, represented by *Halyomorpha halys* (D). Antenniferous tubercles not visible from above in other Pentatominae, e.g. *Raphigaster nebulosa* (E) (Pentatomini) (photos: P.Dioli).



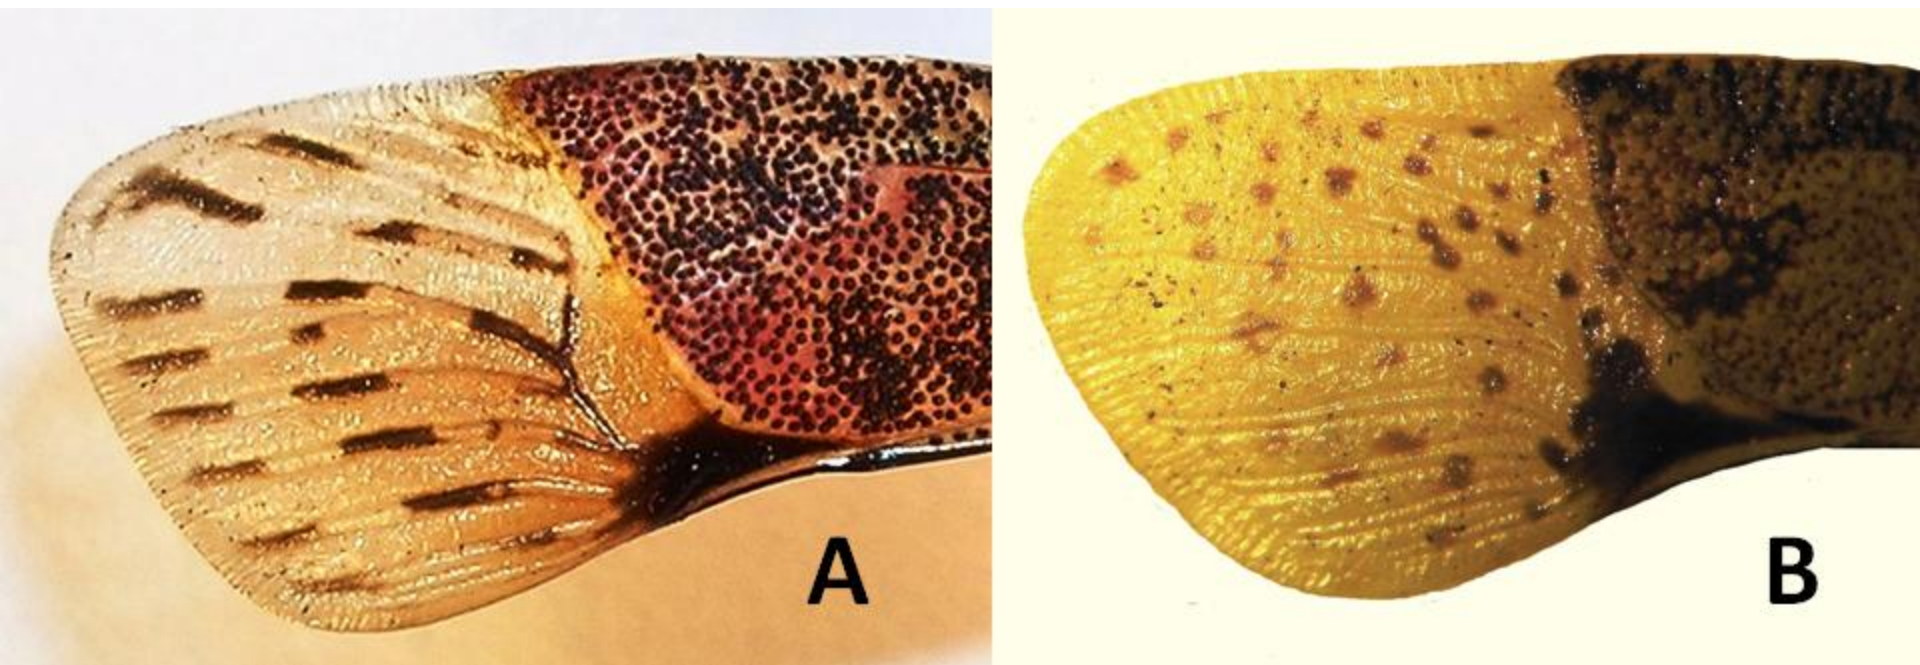

**Fig. 6** Apex of the left wing in *Halyomorpha halys* (a), with typical marked veins on the membrane and in *Raphigaster nebulosa* (b), with marked rounded spots on the membrane (photo: A. Girodo, left; P. Dioli, right).

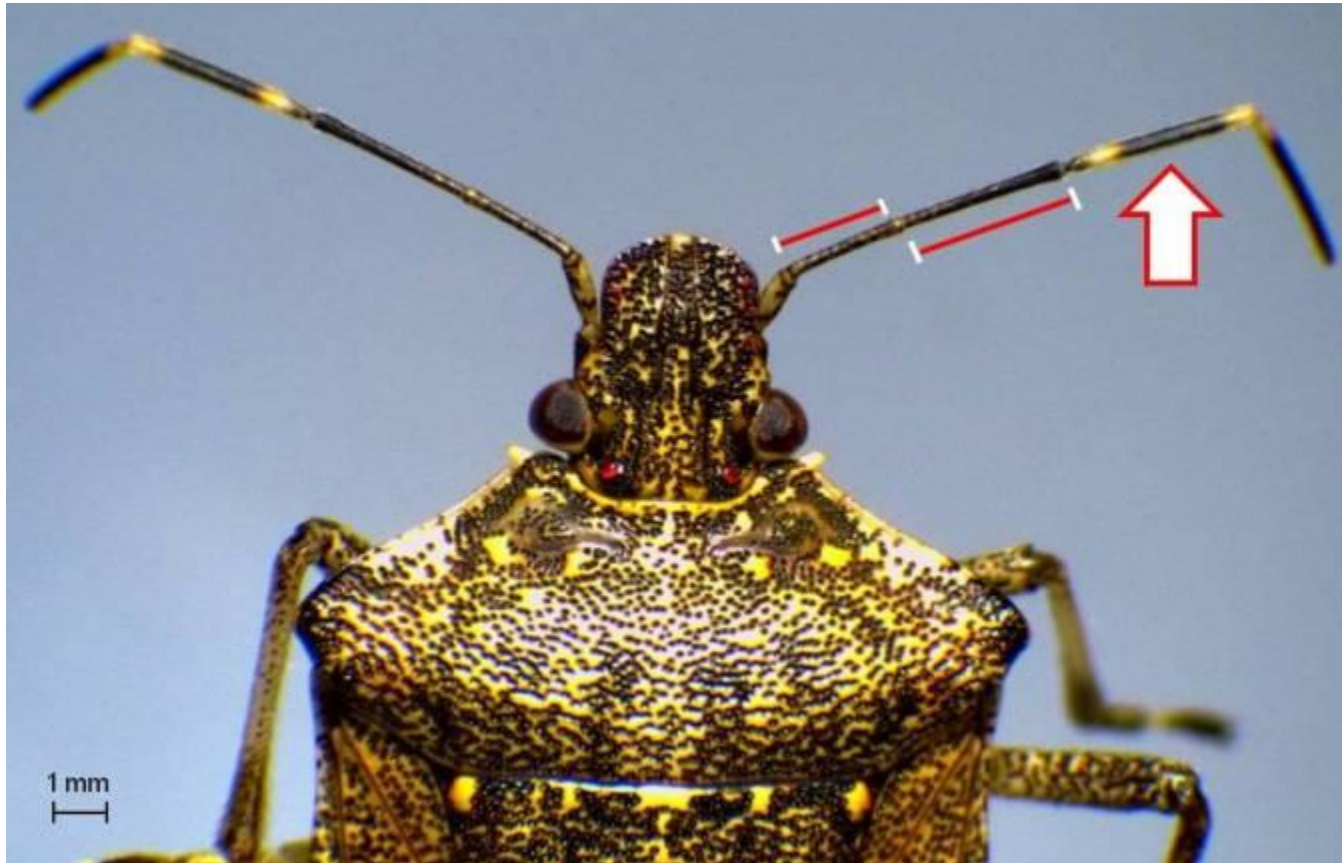

**Fig. 7** Head and pronotum of *Halyomorpha halys*. Arrow indicate pattern on 4<sup>th</sup> antennal segment, red lines indicate different length of 2<sup>nd</sup> and 3<sup>rd</sup> antennal segments (photo: G. Vaccari).



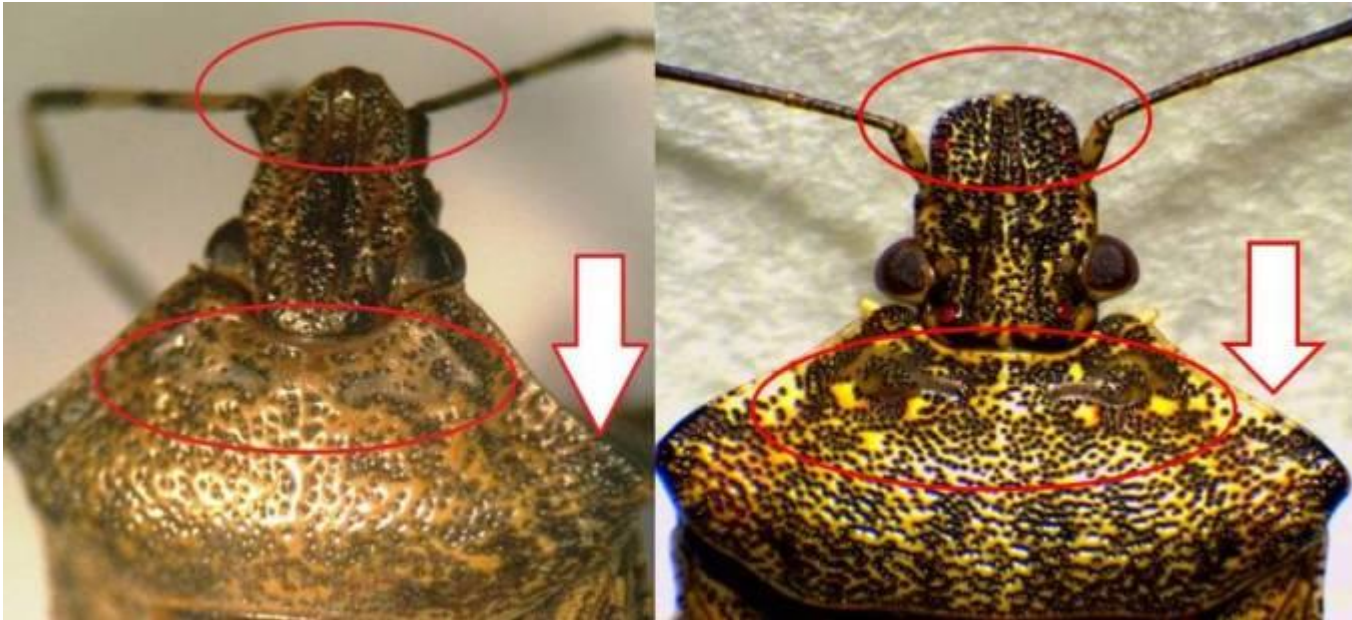

**Fig. 8** Head and pronotum of *Raphigaster nebulosa* (left) and *Halyomorpha halys* (right). Arrow and ovals indicate patterns that differ in the two species (photos: A. Girodo, left; G. Vaccari, right).

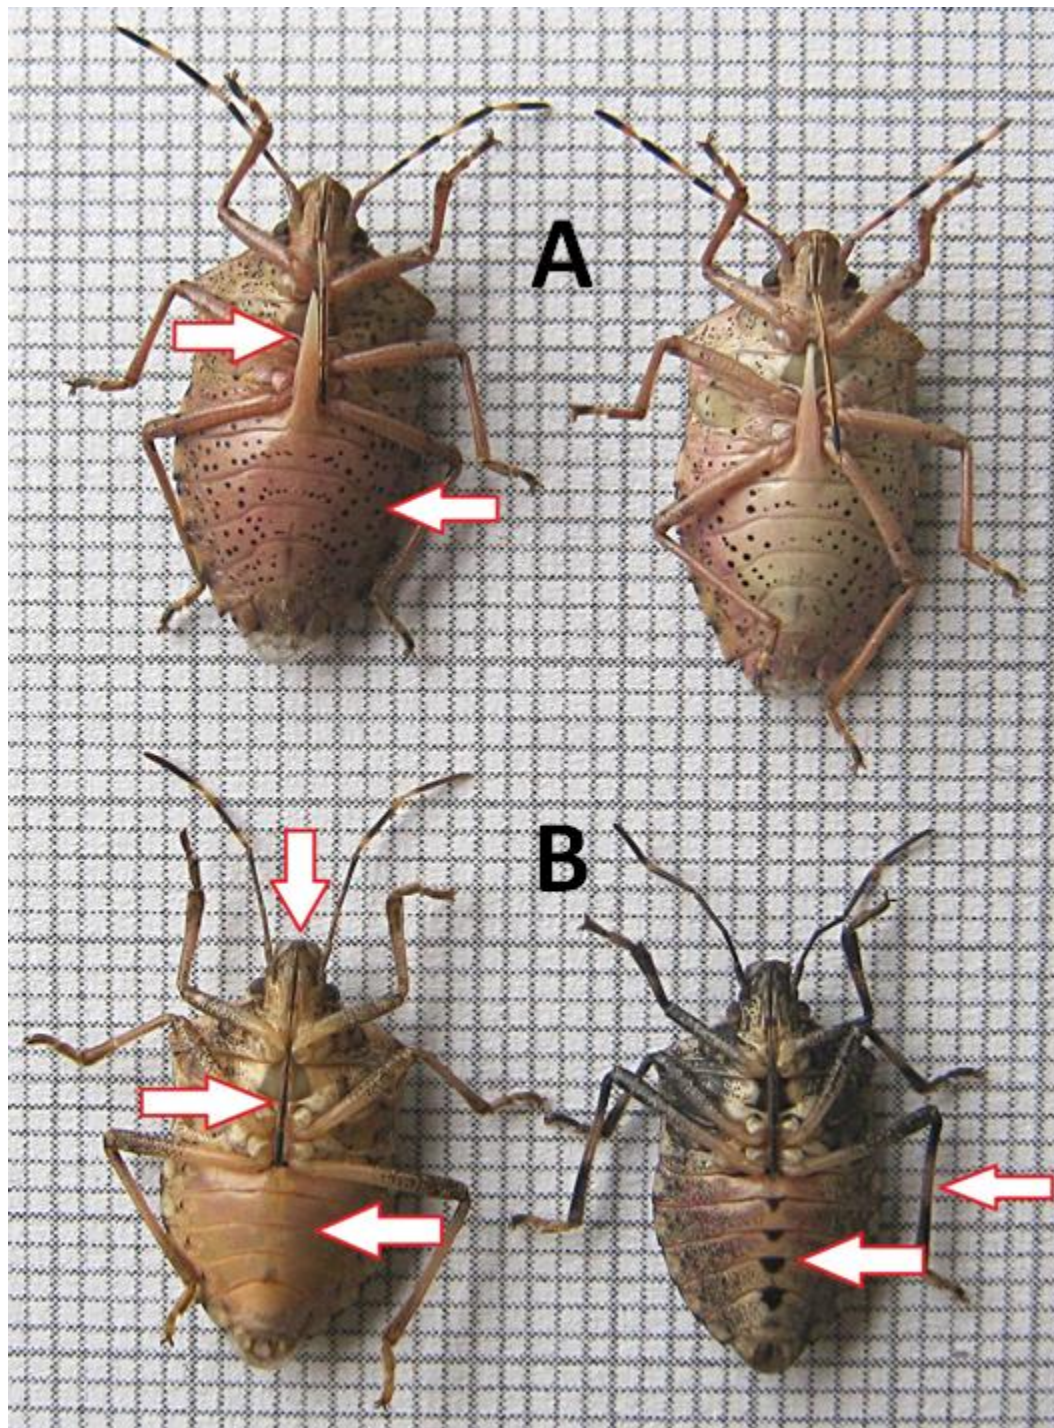

**Fig. 9** Ventral view of the differences between *Raphigaster nebulosa* (A) and *Halyomorpha halys* (B) adults. Arrows indicate patterns that differ in the two species (photo: L. Mola).



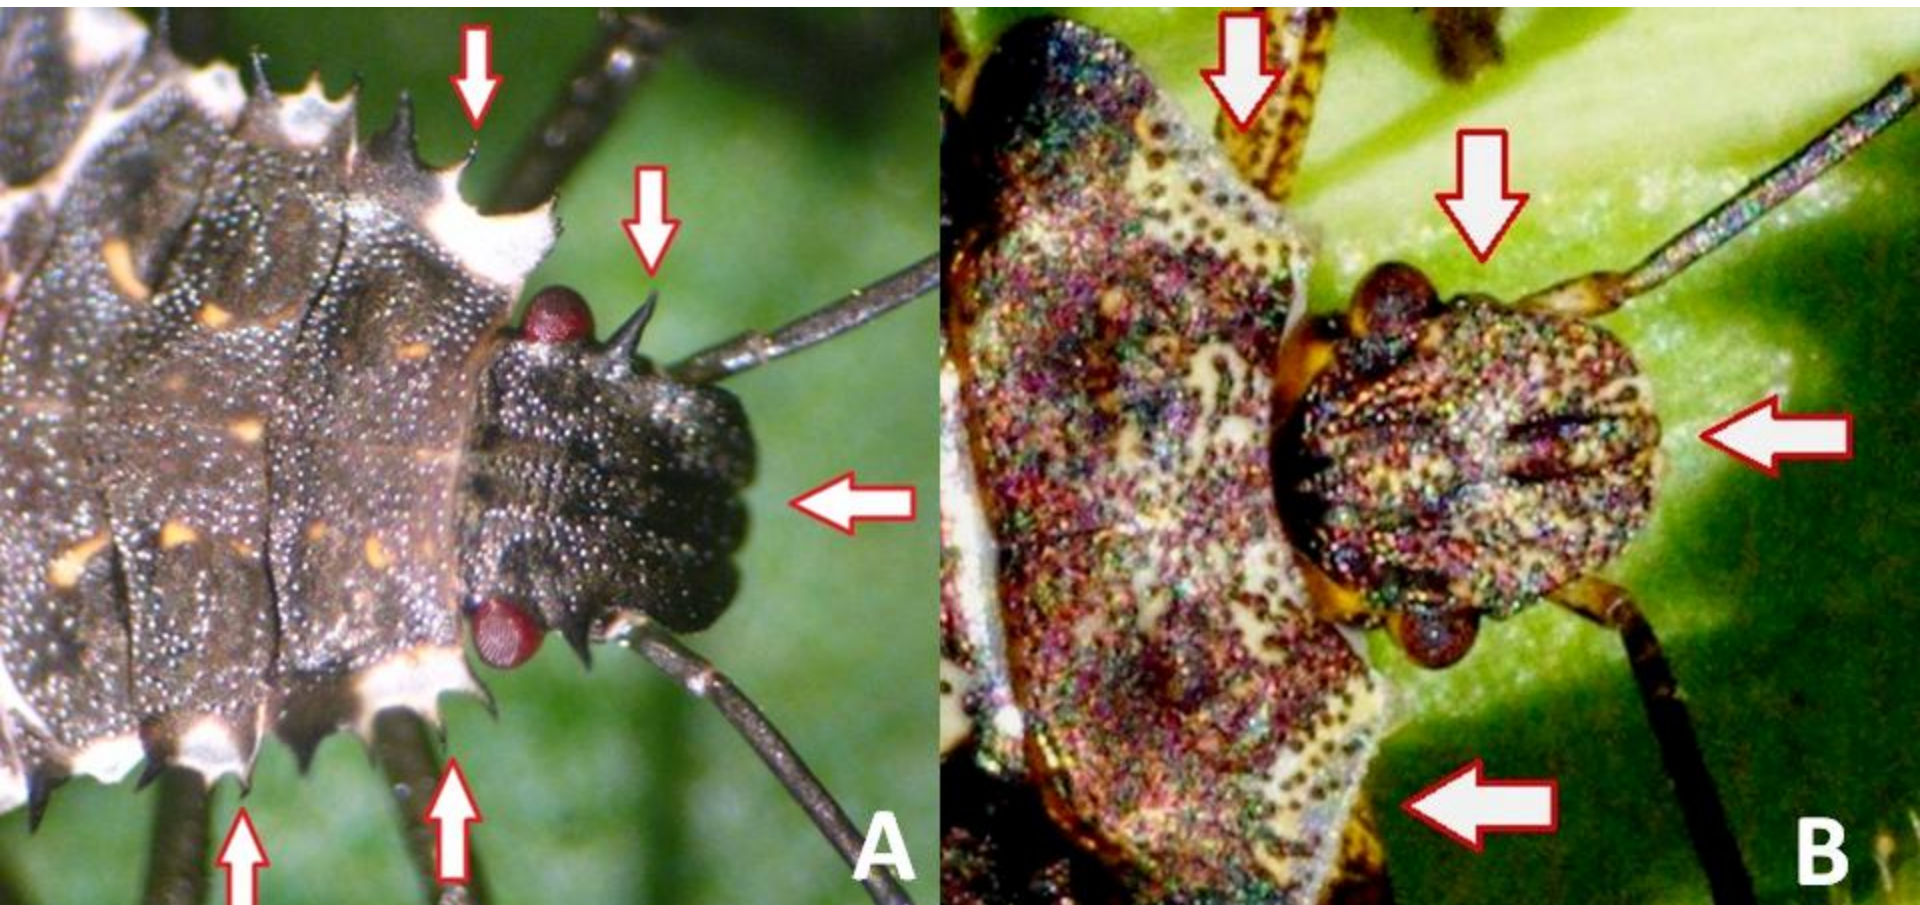

**Fig. 10** (a) Head and pro-meso-metanotum of a second instar nymph of *Halyomorpha halys*, with evident thorns and rectangular apex of the head. (b) Head and pronotum and of fourth instar nymph of *Raphigaster nebulosa*, with no thorns and triangular-rounded apex of the head. Arrows indicate patterns that differ in the two species (photos: S. Bortolini, left; P. Dioli right).
